# Supplementary material for: Modeling heterogeneous responsiveness of intrinsic apoptosis pathway
Source: PubMed Central journal article supplement (PMC3733900; doi:10.1186/1752-0509-7-65), 2013-07-23
Supplement: 1752-0509-7-65-S2.pdf [file 1752-0509-7-65-S2.pdf]

Table S1: Bistability boundary under different c9p/c3p copy-number conditions for the stochastic model with intrinsic noise.

The stochastic model of intrinsic apoptosis pathway subject to intrinsic noise is simulated at the following eight conditions of c9p/c3p molecular copy numbers. Listed are the resulting low and high thresholds of input Cytochrome C (CC), within which bistable responses of CEA exist.

| <b>Number of c9p/c3p molecules</b>                 | <b>Low threshold</b> | <b>High threshold</b> |
|----------------------------------------------------|----------------------|-----------------------|
| [c9p, c3p]= [5x10 <sup>3</sup> , 10]               | CC=13                | CC=780                |
| [c9p, c3p]= [5x10 <sup>3</sup> , 10 <sup>2</sup> ] | CC=12                | CC=730                |
| [c9p, c3p]= [5x10 <sup>3</sup> , 10 <sup>3</sup> ] | CC=11                | CC=70                 |
| [c9p, c3p]= [5x10 <sup>3</sup> , 10 <sup>4</sup> ] | CC=10                | CC=50                 |
| [c9p, c3p]= [10 <sup>4</sup> , 10]                 | CC=13                | CC=770                |
| [c9p, c3p]= [10 <sup>4</sup> , 10 <sup>2</sup> ]   | CC=11                | CC=710                |
| [c9p, c3p]= [10 <sup>4</sup> , 10 <sup>3</sup> ]   | CC=10                | CC=35                 |
| [c9p, c3p]= [10 <sup>4</sup> , 10 <sup>4</sup> ]   | CC=10                | CC=30                 |
