# Supplementary material for: Modeling heterogeneous responsiveness of intrinsic apoptosis pathway
Source: PubMed Central journal article supplement (PMC3733900; doi:10.1186/1752-0509-7-65), 2013-07-23
Supplement: 1752-0509-7-65-S3.pdf [file 1752-0509-7-65-S3.pdf]

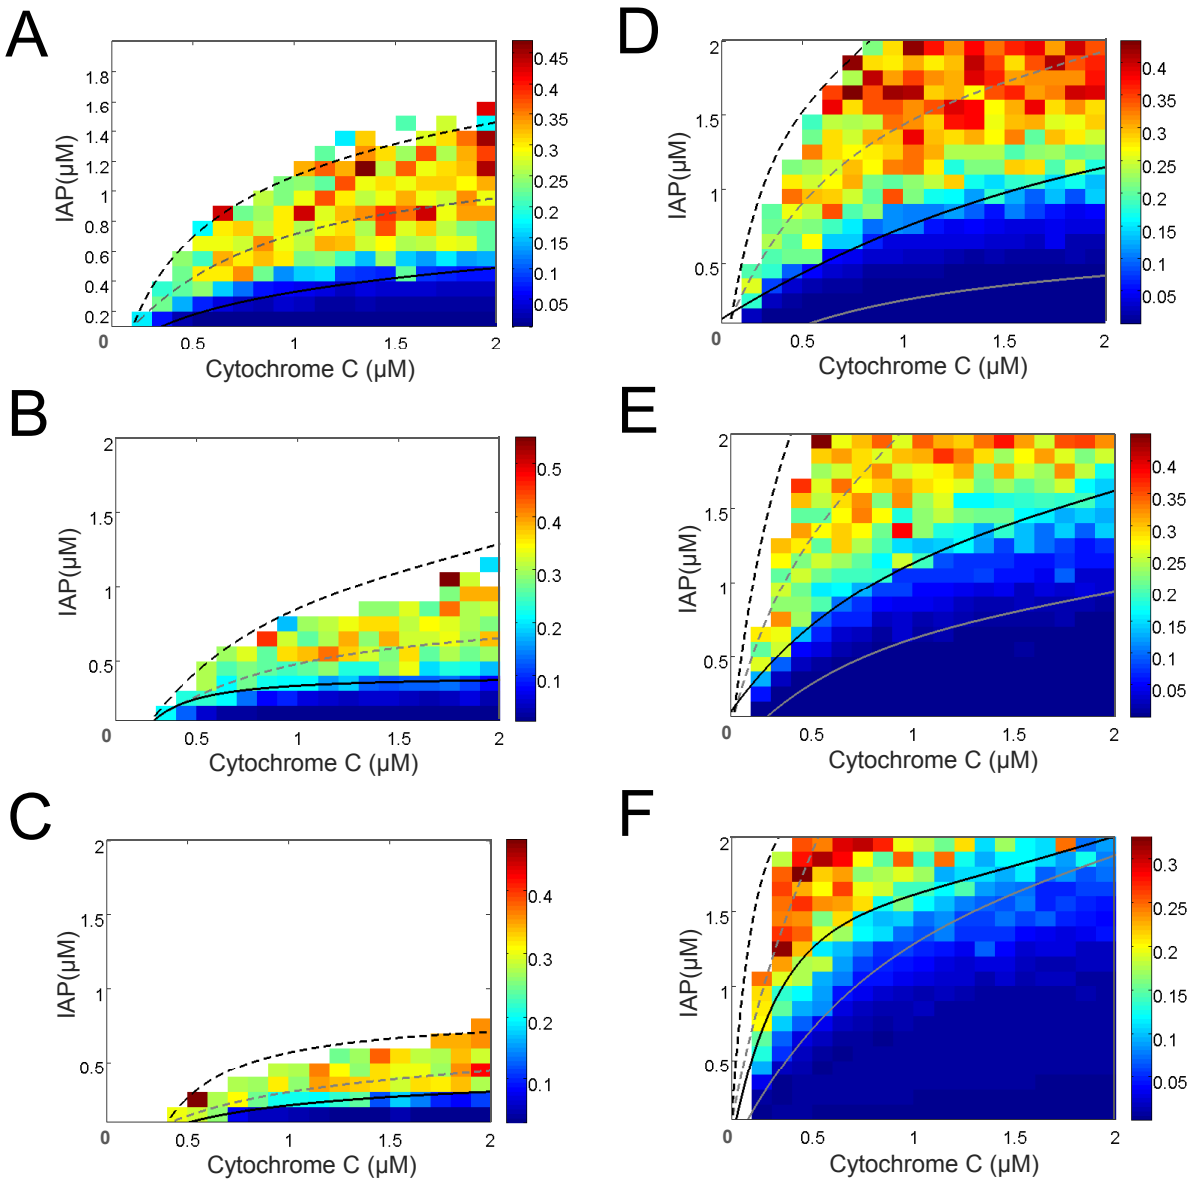

Figure S2. Sensitivity analysis of the result in Figure 8A by perturbation of the parameter  $K_c$ . The 2D heat map of the coefficient of variation of the time delay  $T_d$  is shown for stochastic model under the extrinsic noise of IAP, where  $K_c$  is 2x (A), 4x (B), 8x (C), 1/2x (D), 1/4x (E), and 1/8x (F) its nominal value. The curves superimposed are the low (dashed lines) and high (solid lines) thresholds of the bistability diagrams of the corresponding stochastic model (black color) and deterministic model (grey color). Note that the domain within which the CEA output displays bistable response (between the black dashed and solid lines) achieves the broadest area when  $K_c$  is half of its nominal  $K_c$  value (D), and the bistable response domain rotates clockwise as the value of  $K_c$  increases.
